# Supplementary material
Source: publisher site journal article supplement (http://static.cambridge.org/content/id/urn:cambridge.org:id:article:S0016756819000761/resource/name/S0016756819000761supp001.xlsx)
Supplement: Supplementary file 1 [file S0016756819000761supp001.xlsx]

## Sheet: Table S1. KM fauna catalogue
Geological Magazine New data on the microvertebrate fauna from the Late Jurassic or earliest Cretaceous of Ksar Metlili (Anoual Syncline, eastern Morocco) Maxime Lasseron, Ronan Allain, Emmanuel Gheerbrant, Hamid Haddoumi, Nour-Eddine Jalil, Grégoire Métais, Jean-Claude Rage, Romain Vullo and Samir Zouhri Supplementary Material
Supplementary Table S1. Catalogue of the Ksar Metlili fauna (2010 collection)
	Locality	Collection	Material	Systematics	Number of elements
	KM-A1	KM-A1-1	Left lower molar	Mammalia, Dryolestoidea	1
		KM-A1-2	Left upper molar	Mammalia, Dryolestoidea, Donodontidae, Donodon perscriptoris	1
		KM-A1-3	Tooth	Mammalia, Eutriconodonta	1
		KM-A1-4	Right dentary	Lissamphibia, Allocaudata, Albanerpetontidae, Anoualerpeton unicus	1
		KM-A1-5	Dorsal vertebra	Lepidosauria, Squamata	1
		KM-A1-6	Humerus	Lepidosauria, Squamata	1
		KM-A1-7	Left dentary (fragmentary)	Lepidosauria, Squamata, Scincomorpha	1
		KM-A1-8	Dorsal vertebra	Lepidosauria, Squamata	1
		KM-A1-9	Claw (pedal?)	Archosauria, Dinosauria, Saurischia, Theropoda	1
		KM-A1-10	Tooth	Archosauria, Dinosauria, Saurischia, Theropoda, Dromaeosauridae	1
		KM-A1-11	Claws	Archosauria, Dinosauria, Saurischia, Theropoda	5
		KM-A1-12	Tooth	Archosauria, Dinosauria, Saurischia, Theropoda	1
		KM-A1-13	Teeth	Archosauria, Dinosauria, Saurischia, Theropoda	14
		KM-A1-14	Phalanges	Archosauria, ?Dinosauria	2
		KM-A1-15	Dorsal vertebra	Lissamphibia, Anura	1
		KM-A1-16	Incisor tooth	Mammalia	1
		KM-A1-17	Left dentary	Mammalia	1
		KM-A1-18	Osteoderm	Diapsida, Testudinata	1
		KM-A1-19	Dorsal vertebra	Diapsida, Choristodera	1
		KM-A1-20	Osteoderm	Diapsida, Testudinata	1
		KM-A1-21	Osteoderm	Diapsida, Testudinata	1
		KM-A1-22	Osteoderms (fragments)	Diapsida, Testudinata	9
		KM-A1-23	Osteoderms (fragments)	Diapsida, Testudinata	250
		KM-A1-24	Osteoderm	Diapsida, Testudinata	1
		KM-A1-25	Osteoderms	Archosauria, Crocodylomorpha	8
		KM-A1-26	Teeth	Archosauria, Crocodylomorpha	2
		KM-A1-27	Teeth	Archosauria, Crocodylomorpha	18
		KM-A1-28	Teeth	Archosauria, Crocodylomorpha, Atoposauridae	229
		KM-A1-29	Teeth	Archosauria, Crocodylomorpha, Atoposauridae	12
		KM-A1-30	Teeth	Archosauria, Crocodylomorpha	223
		KM-A1-31	Teeth	Archosauria, Crocodylomorpha	3
		KM-A1-32	Teeth	Archosauria, Crocodylomorpha	54
		KM-A1-33	Teeth	Archosauria, Crocodylomorpha	41
		KM-A1-34	Teeth	Archosauria, Crocodylomorpha, Atoposauridae	144
		KM-A1-35	Teeth	Archosauria, Crocodylomorpha	426
		KM-A1-36	Mandibular fragments	?Mammalia	7
		KM-A1-37	Phalanx	?Mammalia	1
		KM-A1-38	Teeth	Archosauria, Pterosauria	170
		KM-A1-39	Teeth	Archosauria, Pterosauria	18
		KM-A1-40	Fin spine	Actinopterygii, Teleostei, ?Siluriformes	1
		KM-A1-41	Fin rays	Actinopterygii, Ginglymodi indet.	16
		KM-A1-42	Teeth	Actinopterygii, Ginglymodi indet.	182
		KM-A1-43	Teeth	Sarcopterygii, Dipnoi, Ptychoceratodontidae	7
		KM-A1-44	Teeth	Chondrichthyes, Selachii, Egertonodus basanus	17
		KM-A1-45	Teeth	Chondrichthyes, Selachii, Egertonodus basanus	4
		KM-A1-46	Scales	Actinopterygii, Ginglymodi indet.	102
		KM-A1-47	Scale	Actinopterygii, Ginglymodi indet.	1
		KM-A1-48	Teeth	Actinopterygii, Pycnodontiformes	2
		KM-A1-49	Scales	Actinopterygii, Ginglymodi indet.	1482
		KM-A1-50	Scales	Actinopterygii, Ginglymodi indet.	1712
		KM-A1-51	Diverse elements	Lissamphibia, Anura	33
		KM-A1-52	Diverse elements	Vertebrata, Tetrapoda (Lissamphibia? Squamata?)	50
		KM-A1-53	Tooth	Archosauria, Crocodylomorpha, Thalattosuchia, Teleosauridae	1
		KM-A1-54	Teeth	Chondrichthyes, Selachii, Lonchidion marocensis	2
		KM-A1-55	Claw (pedal?)	Dinosauria, Saurischia, Theropoda	1
		KM-A1-56	Claw (ungual?)	Dinosauria, Saurischia, Theropoda	1
		KM-A1-unnumbered	Diverse elements	Actinopterygii	98
		KM-A1-unnumbered	Diverse elements	Actinopterygii	285
		KM-A1-unnumbered	Diverse elements	Actinopterygii	962
	KM-A2	KM-A2-1	Tooth	Mammalia, Eutriconodonta	1
		KM-A2-2	Radioulna	Lissamphibia, Anura	1
		KM-A2-3	Corcaoid	Lissamphibia, Anura	1
		KM-A2-4	Femur	Lissamphibia, Anura	1
		KM-A2-5	Scapula	Lissamphibia, Anura	1
		KM-A2-6	Right dentary	Lepidosauria, Squamata	1
		KM-A2-7	Fused frontals	Lissamphibia, Allocaudata, Albanerpetontidae, Anoualerpeton unicus	1
		KM-A2-8	Tooth	Archosauria, Dinosauria, Ornithischia	1
		KM-A2-9	Teeth	Archosauria, Dinosauria, Saurischia, Theropoda, Maniraptora	2
		KM-A2-10	Teeth	Archosauria, Dinosauria, Saurischia, Theropoda	4
		KM-A2-11	Left postparietal shield	Sarcopterygii, Actinistia, Mawsoniidae	1
		KM-A2-12	Left dentary	Mammalia	1
		KM-A2-13	Osteoderms (fragments)	Archosauria, Crocodylomorpha	24
		KM-A2-14	Osteoderms (fragments)	Diapsida, Testudinata	11
		KM-A2-15	Teeth	Archosauria, Crocodylomorpha	22
		KM-A2-16	Teeth	Archosauria, Crocodylomorpha	17
		KM-A2-17	Teeth	Archosauria, Crocodylomorpha	40
		KM-A2-18	Teeth	Archosauria, Crocodylomorpha, Atoposauridae	164
		KM-A2-19	Mandible	?Mammalia	1
		KM-A2-20	Teeth	Archosauria, Crocodylomorpha	44
		KM-A2-21	Teeth	Archosauria, Pterosauria	64
		KM-A2-22	Mandibular fragments	Actinopterygii, Ginglymodi indet.	4
		KM-A2-23	Scales	Actinopterygii, Ginglymodi indet.	5
		KM-A2-24	Teeth	Sarcopterygii, Dipnoi, Ptychoceratodontidae	2
		KM-A2-25	Tooth	Actinopterygii, Pycnodontiformes	1
		KM-A2-26	Teeth	Chondrichthyes, Selachii, Egertonodus basanus	3
		KM-A2-27	Scales	Actinopterygii, Ginglymodi indet.	190
		KM-A2-28	Long bones (fragments)	Lepidosauria, Squamata	9
		KM-A2-29	Long bones (fragments)	Lissamphibia, Anura	4
		KM-A2-30	Tooth	Archosauria, Crocodylomorpha, Thalattosuchia, Teleosauridae	1
		KM-A2-31	Dentary (fragmentary)	Lissamphibia, Allocaudata, Albanerpetontidae, Anoualerpeton unicus	1
		KM-A2-32	Teeth	Actinopterygii, Ginglymodi indet.	2
		KM-A2-unnumbered	Diverse elements	Actinopterygii, Ginglymodi indet.	86
	KM-B'	KM-B'-1	Left lower molar	Mammalia, Dryolestoidea	1
		KM-B'-2	Left lower molar	Mammalia, Dryolestoidea, Donodontidae, Donodon perscriptoris	1
		KM-B'-3	Lower molar	Mammalia, Eutriconodonta	1
		KM-B'-4	Left lower molar	Mammalia, Stem Boreosphenida, Hypomylos phelizoni	1
		KM-B'-5	Right upper molar	Mammalia, Stem Boreosphenida, Tribotherium africanum	1
		KM-B'-6	Lower molar	Mammalia, Eutriconodonta	1
		KM-B'-7	Tooth	Mammalia (?Dryolestoidea or ?Eutriconodonta)	1
		KM-B'-8	Tooth	Mammalia, Eutriconodonta	1
		KM-B'-9	Right lower molar	Mammalia, Stem Boreosphenida, Hypomylos phelizoni	1
		KM-B'-10	Right lower molar	Mammalia, Stem Boreosphenida, Hypomylos phelizoni	1
		KM-B'-11	Right upper molar	Mammalia, Dryolestoidea, Donodontidae, Donodon perscriptoris	1
		KM-B'-12	Left dentary	Lissamphibia, Allocaudata, Albanerpetontidae, Anoualerpeton unicus	1
		KM-B'-13	Left dentary	Lissamphibia, Allocaudata, Albanerpetontidae, Anoualerpeton unicus	1
		KM-B'-14	Dorsal vertebra	Lepidosauria, Rhynchocephalia, Sphenodontia	1
		KM-B'-15	Right ilium	Lissamphibia, Anura	1
		KM-B'-16	Scapula	Lissamphibia, Anura	1
		KM-B'-17	Dorsal vertebrae	Lissamphibia, Anura	8
		KM-B'-18	Dorsal vertebrae	Lissamphibia, Anura, cf. Alytidae	15
		KM-B'-19	Right dentary (fragmentary)	Lepidosauria, Squamata, Scincomorpha	1
		KM-B'-20	Right dentary	Lepidosauria, Squamata, Lacertilia, Tarratosaurus anoualensis	1
		KM-B'-21	Claw	Archosauria, Dinosauria, Saurischia, Theropoda	1
		KM-B'-22	Tooth	Archosauria, Dinosauria, Saurischia, Theropoda, Maniraptora	1
		KM-B'-23	Teeth	Archosauria, Dinosauria, Saurischia, Theropoda	10
		KM-B'-24	Teeth	Archosauria, Dinosauria, Saurischia, Theropoda	5
		KM-B'-25	Teeth	Archosauria, Dinosauria, Saurischia, Theropoda	5
		KM-B'-26	Teeth	Archosauria, Dinosauria, Saurischia, Theropoda, Dromaeosauridae	4
		KM-B'-27	Dorsal vertebrae	Lissamphibia, Anura (hatchling or neotenic)	7
		KM-B'-28	Dorsal vertebrae	Lepidosauria, Squamata	2
		KM-B'-29	Jaw fragment	Lepidosauria, Squamata	1
		KM-B'-30	Tooth	Mammalia, Eutriconodonta	1
		KM-B'-31	Incisor tooth	Mammalia	1
		KM-B'-32	Incisor tooth	Mammalia	1
		KM-B'-33	Left dentary	Mammalia	1
		KM-B'-34	Left dentary	Mammalia	1
		KM-B'-35	Dentary	Mammalia	1
		KM-B'-36	Teeth	Mammalia, "Symmetrodonta"	2
		KM-B'-37	Teeth	Mammalia, Dryolestoidea	3
		KM-B'-38	Right dentary	Mammalia	1
		KM-B'-39	Osteoderms	Diapsida, Testudinata	51
		KM-B'-40	Osteoderms	Archosauria, Crocodylomorpha	2
		KM-B'-41	Osteoderms (fragments)	Diapsida, Testudinata	6
		KM-B'-42	Premaxillary	Archosauria, Crocodylomorpha, cf. Theriosuchus sp.	1
		KM-B'-43	Tooth	Cynodontia morphotype I	1
		KM-B'-44	Tooth	Cynodontia morphotype I	1
		KM-B'-45	Mandibular fragment	Archosauria, Crocodylomorpha	1
		KM-B'-46	Teeth	Archosauria, Crocodylomorpha	8
		KM-B'-47	Teeth	Archosauria, Crocodylomorpha, Atoposauridae	627
		KM-B'-48	Teeth	Archosauria, Crocodylomorpha, Atoposauridae	1538
		KM-B'-49	Dorsal vertebrae	Diapsida, Choristodera	9
		KM-B'-50	Mandibular fragment	Mammalia	3
		KM-B'-51	Teeth	Archosauria, Crocodylomorpha, Thalattosuchia, Teleosauridae	73
		KM-B'-52	Teeth	Archosauria, Crocodylomorpha	382
		KM-B'-53	Tooth	Archosauria, Crocodylomorpha, Thalattosuchia, Teleosauridae	1
		KM-B'-54	Teeth	Archosauria, Pterosauria	18
		KM-B'-55	Teeth	Archosauria, Pterosauria	120
		KM-B'-56	Teeth	Sarcopterygii, Dipnoi, Ptychoceratodontidae	32
		KM-B'-57	Fin spine	Actinopterygii, Teleostei, ?Siluriformes	67
		KM-B'-58	Ichthyoliths	Actinopterygii, Ginglymodi indet.	23
		KM-B'-59	Scales	Actinopterygii, Ginglymodi indet.	9
		KM-B'-60	Ichthyoliths	Actinopterygii, Ginglymodi indet.	66
		KM-B'-61	Scales	Actinopterygii, Ginglymodi indet.	19
		KM-B'-62	Scales	Actinopterygii	36
		KM-B'-63	Fin rays	Actinopterygii	69
		KM-B'-64	Scales	Actinopterygii, Ginglymodi indet.	66
		KM-B'-65	Scales	Actinopterygii, Ginglymodi indet.	79
		KM-B'-66	Ichthyoliths	Actinopterygii, Ginglymodi indet.	102
		KM-B'-67	Fin rays	Actinopterygii	714
		KM-B'-68	Fin rays	Actinopterygii	116
		KM-B'-69	Vertebrae	Actinopterygii	226
		KM-B'-70	Vertebra	Vertebrata (?Pisces)	1
		KM-B'-71	Vertebra	Vertebrata	1
		KM-B'-72	Scales	Actinopterygii, Ginglymodi indet.	242
		KM-B'-73	Scales	Actinopterygii	811
		KM-B'-74	Scales	Actinopterygii	597
		KM-B'-75	Ichthyoliths	Actinopterygii	712
		KM-B'-76	Fin rays	Actinopterygii	564
		KM-B'-77	Fin rays	Actinopterygii	695
		KM-B'-78	Teeth	Actinopterygii, Ginglymodi indet.	502
		KM-B'-79	Fin rays	Actinopterygii	261
		KM-B'-80	Scales	Actinopterygii	1332
		KM-B'-81	Mandibular fragments	Actinopterygii	449
		KM-B'-82	Mandibular fragments	Vertebrata indet (?Actinopterygii)	19
		KM-B'-83	Mandibular fragments	Vertebrata indet (?Actinopterygii)	21
		KM-B'-84	Scales	Actinopterygii, Ginglymodi indet.	2797
		KM-B'-85	Vertebrae	Vertebrata, Tetrapoda (Lissamphibia? Squamata?)	26
		KM-B'-86	Long bones (fragments)	Lissamphibia, Anura	4
		KM-B'-87	Teeth	Sauropsida	137
		KM-B'-88	Mandible	Vertebrata (Crocodylomorpha?)	1
		KM-B'-89	Teeth	Actinopterygii, Osteoglossiformes	6
		KM-B'-90	Tooth	Squamata	1
		KM-B'-91	Teeth	Archosauria, Crocodylomorpha	51
		KM-B'-92	Tooth	Squamata	1
		KM-B'-93	Maxillary	Vertebrata incertae sedis	1
		KM-B'-94	Claw (ungual?)	Archosauria, Dinosauria, Saurischia, Theropoda	1
		KM-B'-95	Right upper molar	Mammalia, Dryolestoidea, Donodontidae, Donodon perscriptoris	1
		KM-B'-96	Right lower molar	Mammalia, Dryolestoidea	1
		KM-B'-97	Right lower molar	Mammalia, Dryolestoidea	1
		KM-B'-98	Tooth	Cynodontia morphotype I	1
		KM-B'-99	Tooth	Cynodontia	1
	KM-C	KM-C-1	Claw	Archosauria, Dinosauria, Saurischia, Theropoda	1
		KM-C-2	Tooth	Archosauria, Crocodylomorpha, Atoposauridae	1
		KM-C-3	Osteoderms	Archosauria, Crocodylomorpha	2
		KM-C-4	Teeth	Archosauria, Crocodylomorpha	15
		KM-C-5	Teeth	Archosauria, Crocodylomorpha, Thalattosuchia, Teleosauridae	5
		KM-C-6	Mandibular fragments	Actinopterygii, Ginglymodi indet.	3
		KM-C-7	Scales	Actinopterygii, Ginglymodi indet.	125
		KM-C-8	Tooth	Archosauria, Crocodylomorpha, Thalattosuchia, Teleosauridae	1
		KM-C-9	Teeth	Actinopterygii, Ginglymodi indet.	4
	KM-D1	KM-D1-1	Tooth	Mammalia	1
		KM-D1-2	Canine	Mammalia	1
		KM-D1-3	Incisor teeth	Mammalia	2
		KM-D1-4	Bone	Vertebrata incertae sedis (?Mammalia)	1
		KM-D1-5	Dorsal vertebra	Lepidosauria, Squamata	1
		KM-D1-6	Tooth	Archosauria, Dinosauria, Saurischia, Theropoda, Dromaeosauridae	1
		KM-D1-7	Tooth	Archosauria, Crocodylomorpha	1
		KM-D1-8	Tooth	Archosauria, Crocodylomorpha	1
		KM-D1-9	Teeth	Archosauria, Dinosauria, Saurischia, Theropoda	18
		KM-D1-10	Osteoderms (fragments)	Diapsida, Testudinata	66
		KM-D1-11	Osteoderms (fragments)	Archosauria, Crocodylomorpha	7
		KM-D1-12	Dorsal vertebra	Archosauria, Crocodylomorpha	1
		KM-D1-13	Scapula/Coracoid	Archosauria, Crocodylomorpha	1
		KM-D1-14	Teeth	Archosauria, Crocodylomorpha	6
		KM-D1-15	Teeth	Archosauria, Crocodylomorpha	79
		KM-D1-16	Teeth	Archosauria, Crocodylomorpha	9
		KM-D1-17	Teeth	Archosauria, Crocodylomorpha, Atoposauridae	445
		KM-D1-18	Vertebrae	Diapsida, Choristodera	2
		KM-D1-19	Fin spines	Actinopterygii, Teleostei, ?Siluriformes	3
		KM-D1-20	Teeth	Sarcopterygii, Dipnoi, Ptychoceratodontidae	2
		KM-D1-21	Teeth	Actinopterygii, Ginglymodi indet.	148
		KM-D1-22	Teeth	Chondrichthyes, Selachii, Egertonodus sp.	2
		KM-D1-23	Teeth	Actinopterygii, Pycnodontiformes	2
		KM-D1-24	Diverse elements	Actinopterygii	882
		KM-D1-25	Long bones (fragments)	Lissamphibia, Anura	13
		KM-D1-26	Vertebrae	Lepidosauria, Squamata	4
	KM-D2	KM-D2-1	Tooth	Mammalia, Eutriconodonta	1
		KM-D2-2	Right dentary	Mammalia	1
		KM-D2-3	Left dentary	Mammalia	1
		KM-D2-4	Left lower molar	Mammalia, Dryolestoidea	1
		KM-D2-5	Left upper molar	Mammalia, Dryolestoidea, Donodon sp.	1
		KM-D2-6	Maxillary (fragmentary)	?Mammalia /?Sauropsida	1
		KM-D2-7	Dentaries (fragments)	Mammalia	3
		KM-D2-8	Teeth	Archosauria, Dinosauria, Saurischia, Theropoda, Maniraptoriformes	3
		KM-D2-9	Claw	Archosauria, Dinosauria, Saurischia, Theropoda	1
		KM-D2-10	Teeth	Archosauria, Dinosauria, Saurischia, Theropoda	12
		KM-D2-11	Teeth	Archosauria, Dinosauria, Saurischia, Theropoda, Dromaeosauridae	3
		KM-D2-12	Osteoderms (fragments)	Archosauria, Crocodylomorpha	10
		KM-D2-13	Osteoderms (fragments)	Diapsida, Testudinata	8
		KM-D2-14	Teeth	Archosauria, Crocodylomorpha, Atoposauridae	168
		KM-D2-15	Teeth	Archosauria, Crocodylomorpha, Atoposauridae	201
		KM-D2-16	Teeth	Archosauria, Crocodylomorpha	167
		KM-D2-17	Teeth	Archosauria, Pterosauria	193
		KM-D2-18	Teeth	Archosauria, Crocodylomorpha, Atoposauridae	21
		KM-D2-19	Tooth	Archosauria, Crocodylomorpha, Atoposauridae	1
		KM-D2-20	Tooth	Archosauria, Crocodylomorpha	1
		KM-D2-21	Teeth	Archosauria, Pterosauria	22
		KM-D2-22	Teeth	Sarcopterygii, Dipnoi, Ptychoceratodontidae	2
		KM-D2-23	Vertebra	Diapsida, Choristodera	1
		KM-D2-24	Tooth	Sarcopterygii, Dipnoi, Ptychoceratodontidae	1
		KM-D2-25	Tooth	Chondrichthyes, Selachii, Egertonodus basanus	1
		KM-D2-26	Vertebra	?Diapsida, Choristodera	1
		KM-D2-27	Diverse elements	Lepidosauria, Squamata	4
		KM-D2-28	Dentary (fragmentary)	Lissamphibia, Allocaudata, Albanerpetontidae, Anoualerpeton unicus	1
		KM-D2-29	Teeth	Archosauria, Crocodylomorpha, Thalattosuchia	3
		KM-D2-30	Teeth	Actinopterygii, Ginglymodi indet.	142
		KM-D2-unnumbered	Diverse elements	Actinopterygii	551
		KM-D2-unnumbered	Diverse elements	Actinopterygii	40
	Locality unknown	KM-?-1	Tooth	Cynodontia morphotype II	1
				Total number of elements	24542

## Sheet: Table S2. Frequency of sizes
Geological Magazine New data on the microvertebrate fauna from the Late Jurassic or earliest Cretaceous of Ksar Metlili (Anoual Syncline, eastern Morocco) Maxime Lasseron, Ronan Allain, Emmanuel Gheerbrant, Hamid Haddoumi, Nour-Eddine Jalil, Grégoire Métais, Jean-Claude Rage, Romain Vullo and Samir Zouhri Supplementary Material
Supplementary Table S2. Frequency of sizes in each locality of Ksar Metlili
		KM-A1		KM-A2		KM-B'		KM-C		KM-D1		KM-D2
	Size S (mm)	N	Frequency (%)	N	Frequency (%)	N	Frequency (%)	N	Frequency (%)	N	Frequency (%)	N	Frequency (%)
	S < 0.5	0	0	0	0	0	0	0	0	0	0	1	0.238663
	0.5 ≤ S < 1	0	0	0	0	7	2.51799	51	14.6552	6	1.30152	19	4.53461
	1 ≤ S < 2	55	7.54458	40	8.23045	52	18.705	186	53.4483	110	23.8612	79	18.8544
	2 ≤ S < 3	194	26.6118	156	32.0988	59	21.223	59	16.954	178	38.6117	138	32.9356
	3 ≤ S < 4	176	24.1427	113	23.251	37	13.3094	42	12.069	72	15.6182	73	17.4224
	4 ≤ S < 5	109	14.952	86	17.6955	35	12.5899	4	1.14943	44	9.54447	53	12.6492
	5 ≤ S < 10	168	23.0453	73	15.0206	68	24.4604	6	1.72414	41	8.89371	48	11.4558
	10 ≤ S < 20	23	3.15501	17	3.49794	18	6.47482	0	0	8	1.73536	7	1.67064
	20 ≤ S < 30	4	0.548697	1	0.205761	2	0.719424	0	0	2	0.433839	0	0
	S ≥ 30	0	0	0	0	0	0	0	0	0	0	1	0.238663
	Total	729	100	486	100	278	100	348	100	461	100	419	100

## Sheet: Table S3. P-values
Geological Magazine New data on the microvertebrate fauna from the Late Jurassic or earliest Cretaceous of Ksar Metlili (Anoual Syncline, eastern Morocco) Maxime Lasseron, Ronan Allain, Emmanuel Gheerbrant, Hamid Haddoumi, Nour-Eddine Jalil, Grégoire Métais, Jean-Claude Rage, Romain Vullo and Samir Zouhri Supplementary Material
Supplementary Table S3. P-values of the Kolmogorov-Smirnov tests on the comparisons of size frequency distributionsfor each pair of localities
		KM-A1	KM-A2	KM-B'	KM-C	KM-D1	KM-D2
	KM-A1	r = +1
		p = 1
	KM-A2	r = +0.96	r = +1
		p = 1	p = 1
	KM-B'	r = +0.86	r = +0.76	r = +1
		p = 0.97	p = 0.97	p = 1
	KM-C	r = +0.12	r = +0.18	r = +0.44	r = +1
		p = 0.97	p = 0.97	p = 0.68	p = 1
	KM-D1	r = +0.73	r = +0.83	r = +0.77	r = +0.60	r = +1
		p = 1	p = 0.97	p = 0.97	p = 0.97	p = 1
	KM-D2	r = +0.83	r = +0.91	r = +0.82	r = +0.54	r = +0.98	r = +1
		p = 1	p = 0.68	p = 1	p = 0.68	p = 0.97	p = 1
	N (specimen count)	729	486	278	348	461	419
	r is the correlation coefficient and p is the p-value
